# Supplementary material for: Theoretical study on photophysical properties of double helicenes entwined with two perylene diimides
Source: Royal Society of Chemistry journal article supplement (doi:10.1039/d4nj02969k), 2024-01-01
Supplement: d4nj02969k1.pdf [file d4nj02969k1.pdf]

## SUPPORTING INFORMATION

### **Theoretical study on photophysical properties of double helicenes entwined with two perylene diimides**

Yanling Si<sup>a</sup> and Guochun Yang<sup>\*b</sup>

a. School of Environmental and Chemical Engineering, Yanshan University, Qinhuangdao 066004, China

b. State Key Laboratory of Metastable Materials Science & Technology and Key Laboratory for Microstructural Material Physics of Hebei Province, School of Science, Yanshan University, Qinhuangdao 066004, China

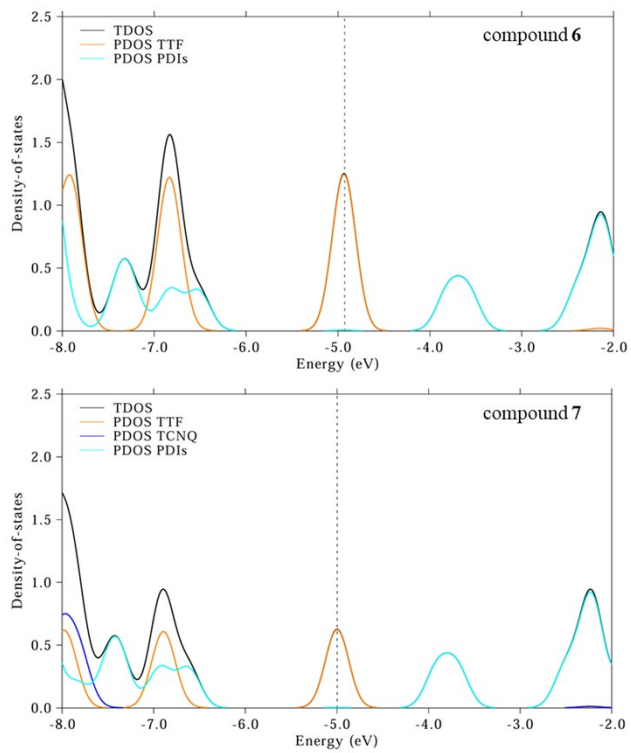

**Fig. S1** Plot of DOS of compounds **6** and **7**. The dashed line represents the HOMO level.

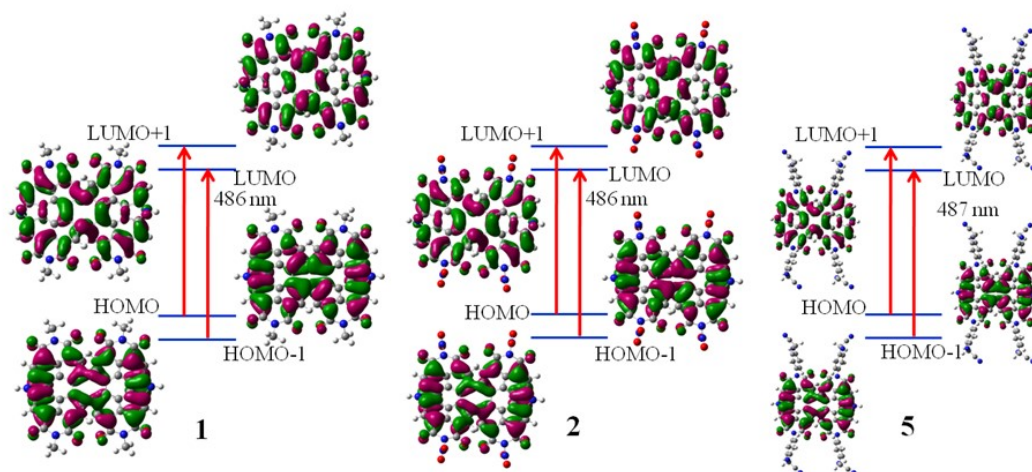

**Fig. S2** Molecular orbital isosurfaces involved in the major electron transitions of compounds **1**, **2** and **5**.

**Table S1** The main concerned bond length (Å), bond angles (°), and the torsion angle (°) defined by the central benzene rings in each PDI subunit for compounds **1-7** calculated at the PBE0/6-311g(d) level.

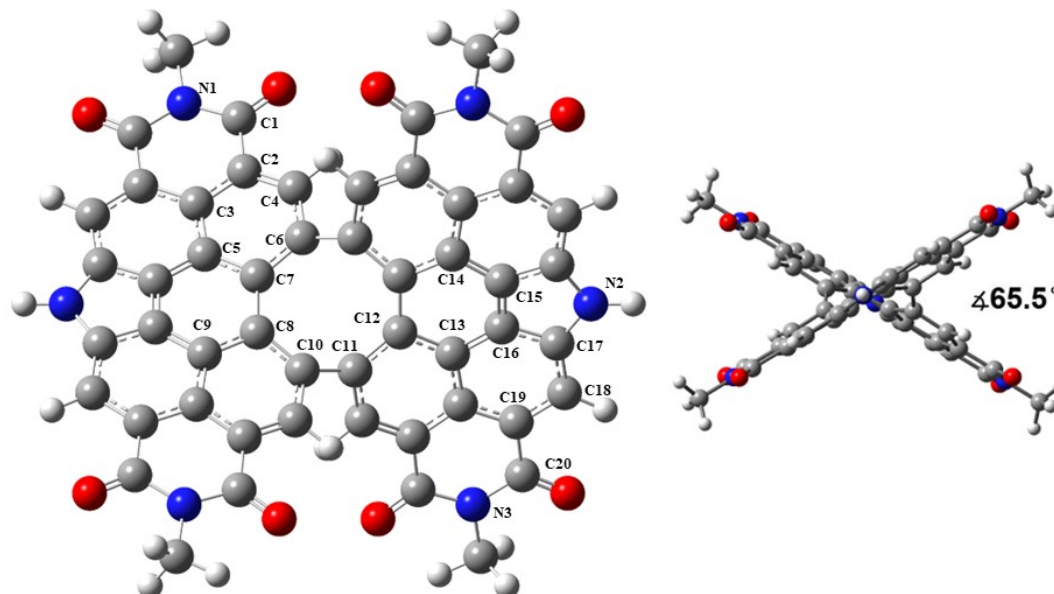

|               | 1     | 2     | 3     | 4      | 5     | 6     | 7     |
|---------------|-------|-------|-------|--------|-------|-------|-------|
| N1-C1         | 1.402 | 1.405 | 1.393 | 1.393  | 1.410 | 1.418 | 1.417 |
| C1-C2         | 1.476 | 1.473 | 1.470 | 1.471  | 1.474 | 1.473 | 1.474 |
| C2-C3         | 1.397 | 1.401 | 1.399 | 1.398  | 1.398 | 1.398 | 1.398 |
| C2-C4         | 1.385 | 1.385 | 1.384 | 1.384  | 1.385 | 1.385 | 1.385 |
| C3-C5         | 1.340 | 1.401 | 1.399 | 1.398  | 1.400 | 1.400 | 1.401 |
| C4-C6         | 1.420 | 1.419 | 1.420 | 1.420  | 1.420 | 1.419 | 1.419 |
| C5-C7         | 1.430 | 1.430 | 1.430 | 1.4292 | 1.429 | 1.429 | 1.430 |
| C6-C7         | 1.404 | 1.403 | 1.403 | 1.404  | 1.404 | 1.403 | 1.403 |
| C7-C8         | 1.481 | 1.480 | 1.481 | 1.480  | 1.481 | 1.481 | 1.481 |
| C8-C10        | 1.404 | 1.403 | 1.403 | 1.403  | 1.404 | 1.403 | 1.404 |
| C10-C11       | 1.496 | 1.496 | 1.495 | 1.495  | 1.495 | 1.495 | 1.495 |
| C12-C13       | 1.430 | 1.430 | 1.430 | 1.430  | 1.430 | 1.430 | 1.429 |
| C13-C16       | 1.380 | 1.381 | 1.381 | 1.381  | 1.380 | 1.380 | 1.380 |
| C14-C15       | 1.380 | 1.381 | 1.381 | 1.3801 | 1.380 | 1.380 | 1.380 |
| C15-C16       | 1.371 | 1.372 | 1.371 | 1.371  | 1.371 | 1.371 | 1.371 |
| C16-C17       | 1.388 | 1.389 | 1.388 | 1.389  | 1.389 | 1.389 | 1.389 |
| C17-N2        | 1.398 | 1.395 | 1.397 | 1.396  | 1.397 | 1.397 | 1.397 |
| C17-C18       | 1.408 | 1.407 | 1.408 | 1.406  | 1.408 | 1.408 | 1.408 |
| C18-C19       | 1.394 | 1.394 | 1.394 | 1.395  | 1.394 | 1.394 | 1.395 |
| C19-C20       | 1.478 | 1.475 | 1.473 | 1.473  | 1.478 | 1.476 | 1.477 |
| C20-N3        | 1.401 | 1.407 | 1.395 | 1.408  | 1.414 | 1.420 | 1.414 |
| C6-C7-C8      | 127.4 | 127.0 | 127.3 | 127.3  | 127.3 | 127.3 | 127.2 |
| C7-C8-C10     | 127.4 | 127.0 | 127.3 | 127.1  | 127.3 | 127.2 | 127.3 |
| C8-C10-C11    | 127.2 | 127.2 | 127.1 | 127.1  | 127.3 | 127.3 | 127.2 |
| C5-C9-C13-C14 | 65.5  | 66.2  | 66.0  | 65.7   | 65.4  | 65.6  | 65.5  |

**Table S2** The  $\beta_{\text{HRS}}$  values ( $\times 10^{-30}$  esu) of the compounds **1-7** calculated at the functionals PBE0, M06-2X, CAM-B3LYP and BHandHLYP and the basis set 6-311G(d).

| Compounds | PBE0  | M06-2X | CAM-B3LYP | BHandHLYP |
|-----------|-------|--------|-----------|-----------|
| <b>1</b>  | 5.07  | 4.29   | 4.46      | 4.52      |
| <b>2</b>  | 5.05  | 4.50   | 4.59      | 4.82      |
| <b>3</b>  | 3.37  | 3.44   | 3.58      | 3.79      |
| <b>4</b>  | 10.18 | 8.03   | 7.91      | 7.74      |
| <b>5</b>  | 7.43  | 6.40   | 6.70      | 6.69      |
| <b>6</b>  | 21.11 | 4.30   | 5.33      | 5.04      |
| <b>7</b>  | 93.51 | 9.40   | 8.18      | 8.71      |

**Table S3** Cartesian coordinates (Å) for the optimized  $S_0$  geometry of compound **1** using the PBE0 with 6-311G(d) basis set.

|   |           |           |           |   |           |           |           |
|---|-----------|-----------|-----------|---|-----------|-----------|-----------|
| C | -5.605659 | -2.107989 | 1.418213  | C | 4.116657  | 0.550561  | 0.409743  |
| C | -5.427209 | -0.933848 | 0.661080  | C | 0.625737  | 1.571996  | 0.408692  |
| C | -4.116663 | -0.550604 | 0.409663  | C | 0.795751  | 2.754755  | 1.176319  |
| C | -2.947038 | -1.180031 | 0.785013  | C | 1.998517  | 3.150070  | 1.736889  |
| C | -3.136590 | -2.382243 | 1.476636  | C | 3.136555  | 2.382184  | 1.476735  |
| C | -4.459159 | -2.799846 | 1.805877  | C | 4.459133  | 2.799809  | 1.805968  |
| C | -1.695539 | -0.667723 | 0.321382  | C | 5.605627  | 2.107980  | 1.418289  |
| C | -0.625753 | -1.572066 | 0.408647  | C | 5.427198  | 0.933828  | 0.661170  |
| C | -0.795782 | -2.754824 | 1.176264  | C | 4.605661  | -4.057592 | -2.564538 |
| C | -1.998562 | -3.150145 | 1.736797  | N | 3.431531  | -4.758986 | -2.867246 |
| C | -4.116928 | 0.548658  | -0.410154 | C | 2.126387  | -4.408883 | -2.495444 |
| C | -2.947563 | 1.178669  | -0.785430 | C | 2.124275  | 4.409590  | 2.495499  |
| C | -1.695841 | 0.666891  | -0.321796 | N | 3.429249  | 4.760317  | 2.867317  |
| C | -5.427645 | 0.931503  | -0.661253 | C | 4.603666  | 4.059242  | 2.564964  |
| C | -5.606629 | 2.105687  | -1.418175 | O | 1.175143  | -5.103633 | -2.778196 |
| C | -4.460463 | 2.798035  | -1.805894 | O | 5.680144  | -4.491653 | -2.923311 |
| C | -3.137673 | 2.380917  | -1.476810 | O | 1.172699  | 5.103930  | 2.778176  |
| C | -2.000007 | 3.149410  | -1.736834 | O | 5.677963  | 4.493873  | 2.923642  |
| C | -0.797044 | 2.754538  | -1.176371 | C | 3.617192  | -5.992441 | -3.619707 |
| C | -0.626485 | 1.571754  | -0.408913 | C | 3.614372  | 5.993868  | 3.619728  |
| C | -2.124335 | -4.409688 | 2.495350  | N | 6.231202  | 0.001293  | 0.000085  |
| N | -3.429307 | -4.760328 | 2.867289  | N | -6.231202 | -0.001320 | -0.000016 |
| C | -4.603729 | -4.059277 | 2.564885  | H | -6.569972 | -2.519679 | 1.696898  |
| C | -4.605584 | 4.057454  | -2.564786 | H | 0.053131  | -3.419161 | 1.301077  |
| N | -3.431507 | 4.759153  | -2.866999 | H | -6.571137 | 2.517070  | -1.696685 |
| C | -2.126380 | 4.409080  | -2.495093 | H | 0.051550  | 3.419298  | -1.301053 |
| O | -5.677999 | -4.493740 | 2.923798  | H | -2.634501 | -6.426570 | 3.797783  |
| O | -1.172733 | -5.103855 | 2.778348  | H | -4.236978 | -6.687373 | 3.053266  |
| O | -5.680074 | 4.491605  | -2.923426 | H | -4.114799 | -5.780057 | 4.564804  |

|   |           |           |           |   |           |           |           |
|---|-----------|-----------|-----------|---|-----------|-----------|-----------|
| O | -1.175063 | 5.103575  | -2.778244 | H | -4.240759 | 6.685508  | -3.053076 |
| C | -3.614412 | -5.993764 | 3.619900  | H | -4.116674 | 5.778724  | -4.564779 |
| C | -3.617159 | 5.992604  | -3.619444 | H | -2.637495 | 6.426299  | -3.796520 |
| C | 0.797071  | -2.754545 | -1.176448 | H | -0.051540 | -3.419288 | -1.301209 |
| C | 0.626501  | -1.571790 | -0.408930 | H | 6.571182  | -2.517117 | -1.696516 |
| C | 1.695852  | -0.666937 | -0.321763 | H | -0.053166 | 3.419090  | 1.301131  |
| C | 2.947583  | -1.178675 | -0.785405 | H | 6.569947  | 2.519689  | 1.696974  |
| C | 3.137703  | -2.380903 | -1.476843 | H | 4.238294  | -6.686608 | -3.052097 |
| C | 2.000041  | -3.149368 | -1.736953 | H | 4.119410  | -5.778851 | -4.563645 |
| C | 4.116926  | -0.548672 | -0.410092 | H | 2.637328  | -6.424639 | -3.799328 |
| C | 5.427661  | -0.931521 | -0.661187 | H | 4.236862  | 6.687434  | 3.052939  |
| C | 5.606663  | -2.105706 | -1.418103 | H | 2.634458  | 6.426681  | 3.797607  |
| C | 4.460490  | -2.798046 | -1.805843 | H | 4.114827  | 5.780325  | 4.564625  |
| C | 1.695530  | 0.667656  | 0.321439  | H | 7.236513  | 0.001463  | 0.000202  |
| C | 2.947020  | 1.179973  | 0.785101  | H | -7.236512 | -0.001459 | 0.000107  |

**Table S4** Cartesian coordinates (Å) for the optimized S<sub>0</sub> geometry of compound **2** using the PBE0 with 6-311G(d) basis set.

|   |           |          |           |   |           |           |           |
|---|-----------|----------|-----------|---|-----------|-----------|-----------|
| C | -2.088560 | 5.609646 | 1.438294  | C | 0.547065  | -4.116868 | 0.413180  |
| C | -0.924801 | 5.428907 | 0.667684  | C | 1.561583  | -0.623557 | 0.412782  |
| C | -0.547015 | 4.116850 | 0.413403  | C | 2.737582  | -0.784899 | 1.189418  |
| C | -1.176741 | 2.948482 | 0.794118  | C | 3.129632  | -1.984486 | 1.758858  |
| C | -2.373369 | 3.134758 | 1.497899  | C | 2.373548  | -3.134814 | 1.497495  |
| C | -2.778571 | 4.464666 | 1.833055  | C | 2.778788  | -4.464735 | 1.832558  |
| C | -0.664857 | 1.698856 | 0.324778  | C | 2.088728  | -5.609700 | 1.437840  |
| C | -1.561537 | 0.623541 | 0.412992  | C | 0.924879  | -5.428934 | 0.667372  |
| C | -2.737441 | 0.784854 | 1.189780  | C | -4.023174 | -4.627395 | -2.608315 |
| C | -3.129422 | 1.984419 | 1.759311  | N | -4.683307 | -3.416667 | -2.889023 |
| C | 0.547384  | 4.116811 | -0.413356 | C | -4.380314 | -2.092487 | -2.529409 |
| C | 1.177013  | 2.948394 | -0.794085 | C | 4.380054  | -2.093004 | 2.529372  |
| C | 0.665013  | 1.698804 | -0.324776 | N | 4.682913  | -3.417226 | 2.888940  |
| C | 0.925310  | 5.428841 | -0.667573 | C | 4.022684  | -4.627880 | 2.608144  |
| C | 2.089106  | 5.609495 | -1.438147 | O | -5.101599 | -1.180193 | -2.838148 |
| C | 2.779016  | 4.464462 | -1.832930 | O | -4.476585 | -5.675868 | -2.991024 |
| C | 2.373680  | 3.134581 | -1.497825 | O | 5.101417  | -1.180794 | 2.838179  |
| C | 3.129642  | 1.984184 | -1.759236 | O | 4.475989  | -5.676409 | 2.990826  |
| C | 2.737539  | 0.784639 | -1.189747 | N | -0.000300 | -6.232290 | -0.000154 |
| C | 1.561599  | 0.623411 | -0.412996 | N | 0.000297  | 6.232288  | 0.000075  |
| C | -4.379751 | 2.092907 | 2.529978  | H | -2.492035 | 6.575788  | 1.722914  |
| N | -4.682569 | 3.417119 | 2.889623  | H | -3.397780 | -0.066985 | 1.317774  |
| C | -4.022374 | 4.627786 | 2.608793  | H | 2.492686  | 6.575608  | -1.722716 |
| C | 4.022860  | 4.627489 | -2.608623 | H | 3.397807  | -0.067255 | -1.317742 |
| N | 4.682956  | 3.416772 | -2.889462 | H | -3.397967 | 0.067301  | -1.317335 |

|   |           |           |           |   |           |           |           |
|---|-----------|-----------|-----------|---|-----------|-----------|-----------|
| C | 4.380007  | 2.092579  | -2.529860 | H | -2.492896 | -6.575547 | -1.722659 |
| O | -4.475627 | 5.676303  | 2.991569  | H | 3.397938  | 0.066935  | 1.317362  |
| O | -5.101074 | 1.180683  | 2.838834  | H | 2.492236  | -6.575852 | 1.722379  |
| O | 4.476228  | 5.675976  | -2.991346 | H | -0.000348 | -7.238140 | -0.000176 |
| O | 5.101259  | 1.180298  | -2.838715 | H | 0.000340  | 7.238138  | 0.000084  |
| C | -2.737684 | -0.784597 | -1.189448 | N | -5.931783 | -3.570135 | -3.664600 |
| C | -1.561653 | -0.623399 | -0.412830 | N | -5.930913 | 3.570708  | 3.665391  |
| C | -0.665054 | -1.698795 | -0.324760 | N | 5.931356  | -3.570844 | 3.664557  |
| C | -1.177110 | -2.948367 | -0.794055 | N | 5.931343  | 3.570270  | -3.665183 |
| C | -2.373862 | -3.134528 | -1.497658 | O | 6.909757  | 3.740293  | -3.007945 |
| C | -3.129855 | -1.984121 | -1.758935 | O | 5.794322  | 3.502241  | -4.846526 |
| C | -0.547435 | -4.116798 | -0.413447 | O | 6.909717  | -3.740959 | 3.007229  |
| C | -0.925392 | -5.428819 | -0.667664 | O | 5.794443  | -3.502779 | 4.845927  |
| C | -2.089282 | -5.609444 | -1.438104 | O | -5.793857 | 3.502612  | 4.846722  |
| C | -2.779238 | -4.464397 | -1.832764 | O | -6.909329 | 3.740850  | 3.008194  |
| C | 0.664894  | -1.698870 | 0.324634  | O | -6.910115 | -3.740178 | -3.007252 |
| C | 1.176836  | -2.948513 | 0.793864  | O | -5.794901 | -3.502035 | -4.845950 |

**Table S5** Cartesian coordinates (Å) for the optimized  $S_0$  geometry of compound **3** using the PBE0 with 6-311G(d) basis set.

|   |           |           |           |   |           |           |           |
|---|-----------|-----------|-----------|---|-----------|-----------|-----------|
| C | -5.606170 | -2.103252 | 1.421789  | C | 4.115622  | 0.547745  | 0.411980  |
| C | -5.426545 | -0.930561 | 0.662931  | C | 0.625321  | 1.570025  | 0.409985  |
| C | -4.115661 | -0.548155 | 0.411468  | C | 0.793998  | 2.752426  | 1.178376  |
| C | -2.946343 | -1.177008 | 0.790806  | C | 1.995166  | 3.144072  | 1.744450  |
| C | -3.135178 | -2.375120 | 1.486977  | C | 3.135105  | 2.374876  | 1.487173  |
| C | -4.460043 | -2.793149 | 1.814705  | C | 4.459972  | 2.793087  | 1.814669  |
| C | -1.695061 | -0.666348 | 0.323359  | C | 5.606113  | 2.103243  | 1.421739  |
| C | -0.625369 | -1.570372 | 0.409816  | C | 5.426502  | 0.930393  | 0.663125  |
| C | -0.794079 | -2.752760 | 1.178201  | C | 4.608018  | -4.046573 | -2.574636 |
| C | -1.995256 | -3.144309 | 1.744347  | N | 3.423095  | -4.704436 | -2.904202 |
| C | -4.115614 | 0.547896  | -0.412130 | C | 2.125244  | -4.397170 | -2.502393 |
| C | -2.946237 | 1.176836  | -0.791188 | C | 2.125326  | 4.396972  | 2.502248  |
| C | -1.695007 | 0.666092  | -0.323645 | N | 3.423260  | 4.704547  | 2.903566  |
| C | -5.426474 | 0.930643  | -0.663220 | C | 4.608136  | 4.046526  | 2.574160  |
| C | -5.606019 | 2.103620  | -1.421653 | O | 1.208403  | -5.146661 | -2.771110 |
| C | -4.459846 | 2.793463  | -1.814500 | O | 5.674540  | -4.523571 | -2.911214 |
| C | -3.135005 | 2.375173  | -1.486998 | O | 1.208565  | 5.146567  | 2.770806  |
| C | -1.995028 | 3.144390  | -1.744092 | O | 5.674691  | 4.523552  | 2.910616  |
| C | -0.793889 | 2.752625  | -1.178037 | N | 6.230374  | -0.000136 | -0.000066 |
| C | -0.625280 | 1.570108  | -0.409814 | N | -6.230393 | 0.000118  | -0.000078 |
| C | -2.125470 | -4.397171 | 2.502189  | H | -6.571499 | -2.514247 | 1.698163  |
| N | -3.423298 | -4.704035 | 2.904555  | H | 0.054807  | -3.417807 | 1.300228  |
| C | -4.608221 | -4.046437 | 2.574393  | H | -6.571318 | 2.514875  | -1.697750 |

|   |           |           |           |   |           |           |           |
|---|-----------|-----------|-----------|---|-----------|-----------|-----------|
| C | -4.607952 | 4.046976  | -2.573893 | H | 0.055038  | 3.417646  | -1.299904 |
| N | -3.422945 | 4.704625  | -2.903699 | H | -0.054993 | -3.417736 | -1.300397 |
| C | -2.125192 | 4.397474  | -2.501520 | H | 6.571356  | -2.514473 | -1.698373 |
| O | -5.674809 | -4.523435 | 2.910835  | H | -0.054915 | 3.417436  | 1.300421  |
| O | -1.208760 | -5.146956 | 2.770391  | H | 6.571431  | 2.514403  | 1.697909  |
| O | -5.674432 | 4.524191  | -2.910189 | H | 7.235768  | -0.000085 | -0.000147 |
| O | -1.208200 | 5.146785  | -2.770383 | H | -7.235787 | 0.000052  | -0.000232 |
| C | 0.793931  | -2.752742 | -1.178341 | N | 3.555075  | -5.815765 | -3.743683 |
| C | 0.625284  | -1.570378 | -0.409899 | H | 4.464407  | -6.218924 | -3.544113 |
| C | 1.695016  | -0.666400 | -0.323457 | H | 2.810629  | -6.456581 | -3.489425 |
| C | 2.946266  | -1.177091 | -0.790973 | N | -3.555241 | -5.815360 | 3.743996  |
| C | 3.135048  | -2.375199 | -1.487169 | H | -4.465841 | -6.216694 | 3.546310  |
| C | 1.995082  | -3.144350 | -1.744493 | H | -2.812846 | -6.457751 | 3.487634  |
| C | 4.115611  | -0.548247 | -0.411697 | N | 3.555192  | 5.815968  | 3.742870  |
| C | 5.426479  | -0.930721 | -0.663148 | H | 4.465310  | 6.217982  | 3.544470  |
| C | 5.606049  | -2.103428 | -1.421993 | H | 2.811950  | 6.457658  | 3.487316  |
| C | 4.459900  | -2.793290 | -1.814882 | N | -3.555026 | 5.816094  | -3.742982 |
| C | 1.695021  | 0.665987  | 0.323648  | H | -4.462908 | 6.221331  | -3.541043 |
| C | 2.946281  | 1.176662  | 0.791173  | H | -2.808525 | 6.455316  | -3.490649 |

**Table S6** Cartesian coordinates (Å) for the optimized  $S_0$  geometry of compound **4** using the PBE0 with 6-311G(d) basis set.

|   |          |           |           |   |           |           |           |
|---|----------|-----------|-----------|---|-----------|-----------|-----------|
| C | 5.726505 | -1.715913 | -0.877677 | C | -4.055720 | 0.912552  | -0.823453 |
| C | 5.470199 | -0.555645 | -0.125415 | C | -0.581712 | 1.935240  | -0.470056 |
| C | 4.138049 | -0.184497 | 0.005492  | C | -0.672043 | 3.118256  | -1.250648 |
| C | 3.013093 | -0.812734 | -0.491160 | C | -1.814244 | 3.515539  | -1.924533 |
| C | 3.269125 | -2.006046 | -1.178615 | C | -2.975301 | 2.750309  | -1.777384 |
| C | 4.625988 | -2.407729 | -1.383996 | C | -4.260474 | 3.169379  | -2.235739 |
| C | 1.722064 | -0.299147 | -0.150906 | C | -5.439058 | 2.477749  | -1.965394 |
| C | 0.661564 | -1.196107 | -0.348527 | C | -5.335357 | 1.301493  | -1.195912 |
| C | 0.899748 | -2.369274 | -1.109185 | C | -4.866585 | -3.645690 | 2.145790  |
| C | 2.150199 | -2.760041 | -1.558304 | N | -3.689570 | -4.303347 | 2.551770  |
| C | 4.055675 | 0.912956  | 0.823269  | C | -2.334869 | -4.003738 | 2.322954  |
| C | 2.855292 | 1.546122  | 1.076963  | C | -1.868471 | 4.774536  | -2.683828 |
| C | 1.656878 | 1.033291  | 0.490843  | N | -3.137716 | 5.133899  | -3.131104 |
| C | 5.335279 | 1.302001  | 1.195730  | C | -4.333276 | 4.428180  | -3.000285 |
| C | 5.438880 | 2.478221  | 1.965282  | O | -1.460057 | -4.724355 | 2.728313  |
| C | 4.260222 | 3.169715  | 2.235678  | O | -5.947832 | -4.099006 | 2.425670  |
| C | 2.975079 | 2.750512  | 1.777378  | O | -0.911002 | 5.479477  | -2.926269 |
| C | 1.813965 | 3.515620  | 1.924604  | O | -5.348532 | 4.862735  | -3.506553 |
| C | 0.671767 | 3.118259  | 1.250767  | N | -6.202714 | 0.376831  | -0.611455 |
| C | 0.581549 | 1.935283  | 0.470103  | N | 6.202708  | 0.377414  | 0.611255  |
| C | 2.335184 | -4.003632 | -2.322864 | H | 6.716346  | -2.116272 | -1.070617 |



|   |           |           |           |   |           |           |           |
|---|-----------|-----------|-----------|---|-----------|-----------|-----------|
| N | 3.689907  | -4.303088 | -2.551763 | H | 0.064479  | -3.028184 | -1.324485 |
| C | 4.866877  | -3.645224 | -2.145973 | H | 6.372139  | 2.890354  | 2.334369  |
| C | 4.332948  | 4.428464  | 3.000306  | H | -0.186291 | 3.781581  | 1.290714  |
| N | 3.137324  | 5.134256  | 3.130993  | H | -0.064209 | -3.028120 | 1.324612  |
| C | 1.868058  | 4.774516  | 2.684087  | H | -6.716167 | -2.116881 | 1.070428  |
| O | 5.948153  | -4.098602 | -2.425629 | H | 0.185936  | 3.781686  | -1.290529 |
| O | 1.460430  | -4.724378 | -2.728112 | H | -6.372349 | 2.889808  | -2.334488 |
| O | 5.348111  | 4.863037  | 3.506675  | H | -7.204025 | 0.383606  | -0.704237 |
| O | 0.910470  | 5.479199  | 2.926773  | H | 7.204026  | 0.384320  | 0.703961  |
| C | -0.899540 | -2.369316 | 1.109224  | N | -3.920378 | -5.543670 | 3.316125  |
| C | -0.661447 | -1.196165 | 0.348516  | N | 3.920823  | -5.543482 | -3.315976 |
| C | -1.722029 | -0.299317 | 0.150827  | N | -3.238850 | 6.394728  | -3.728237 |
| C | -3.013019 | -0.813029 | 0.491026  | N | 3.238402  | 6.395015  | 3.728070  |
| C | -3.268962 | -2.006341 | 1.178510  | O | 3.976510  | -5.398390 | -4.497585 |
| C | -2.149970 | -2.760192 | 1.558298  | O | 4.020194  | -6.528842 | -2.653797 |
| C | -4.138014 | -0.184905 | -0.005677 | O | -4.019799 | -6.529094 | 2.654048  |
| C | -5.470135 | -0.556158 | 0.125231  | O | -3.975949 | -5.398469 | 4.497728  |
| C | -5.726358 | -1.716431 | 0.877516  | H | 2.347422  | 6.572474  | 4.179200  |
| C | -4.625790 | -2.408154 | 1.383849  | H | 3.985758  | 6.333351  | 4.410915  |
| C | -1.656954 | 1.033150  | -0.490898 | H | -3.986862 | 6.333191  | -4.410295 |
| C | -2.855397 | 1.545877  | -1.077065 | H | -2.348130 | 6.571951  | -4.179875 |

**Table S7** Cartesian coordinates (Å) for the optimized  $S_0$  geometry of compound **5** using the PBE0 with 6-311G(d) basis set.

|   |           |          |           |   |           |           |           |
|---|-----------|----------|-----------|---|-----------|-----------|-----------|
| C | 2.282981  | 4.871774 | -2.918186 | H | -3.397484 | -0.274058 | -1.287321 |
| C | 1.105156  | 4.945025 | -2.149898 | H | -2.699209 | -6.760060 | 0.231431  |
| C | 0.685511  | 3.768222 | -1.544148 | H | -0.196488 | -6.989107 | 2.055440  |
| C | 1.281423  | 2.523681 | -1.572388 | H | 0.225663  | 6.891973  | -2.030363 |
| C | 2.487498  | 2.477426 | -2.282128 | C | -5.860323 | 4.556627  | 2.409198  |
| C | 2.941802  | 3.643659 | -2.965473 | C | -5.932299 | 4.528691  | 3.794505  |
| C | 0.733420  | 1.467591 | -0.780073 | C | -6.957761 | 4.951934  | 1.660522  |
| C | 1.605074  | 0.390306 | -0.557162 | C | -7.108485 | 4.890851  | 4.431876  |
| C | 2.789516  | 0.302954 | -1.334632 | H | -5.068770 | 4.222619  | 4.374230  |
| C | 3.217929  | 1.288278 | -2.208458 | C | -8.134280 | 5.319830  | 2.297642  |
| C | -0.413807 | 4.028255 | -0.766900 | H | -6.891774 | 4.982104  | 0.578912  |
| C | -1.077061 | 3.029308 | -0.083464 | C | -8.213834 | 5.287077  | 3.684836  |
| C | -0.600032 | 1.684553 | -0.173082 | H | -7.155073 | 4.875515  | 5.516370  |
| C | -0.758722 | 5.366969 | -0.897301 | H | -8.985010 | 5.639692  | 1.704798  |
| C | -1.927593 | 5.783169 | -0.231553 | C | -6.087286 | -4.332633 | -2.462095 |
| C | -2.653075 | 4.811666 | 0.457381  | C | -6.149908 | -4.296860 | -3.847672 |
| C | -2.273691 | 3.438368 | 0.518104  | C | -7.207975 | -4.673151 | -1.720805 |
| C | -3.069873 | 2.438266 | 1.082721  | C | -7.339391 | -4.596859 | -4.492704 |
| C | -2.708432 | 1.116003 | 0.886277  | H | -5.268704 | -4.033677 | -4.421768 |

|   |           |           |           |   |            |           |           |
|---|-----------|-----------|-----------|---|------------|-----------|-----------|
| C | -1.532340 | 0.705717  | 0.205233  | C | -8.397863  | -4.979062 | -2.365601 |
| C | 4.475043  | 1.153454  | -2.966738 | H | -7.149989  | -4.709796 | -0.638963 |
| N | 4.866305  | 2.298373  | -3.691639 | C | -8.467600  | -4.938853 | -3.753181 |
| C | 4.202843  | 3.546063  | -3.729553 | H | -7.378856  | -4.576084 | -5.577365 |
| C | -3.908272 | 5.209190  | 1.128025  | H | -9.267084  | -5.257105 | -1.778493 |
| N | -4.643081 | 4.174356  | 1.750561  | C | 5.863990   | -2.604659 | 4.567216  |
| C | -4.324260 | 2.800817  | 1.767024  | C | 6.956328   | -3.381118 | 4.205684  |
| O | 4.663815  | 4.468114  | -4.360389 | C | 5.927806   | -1.780924 | 5.681212  |
| O | 5.140835  | 0.145882  | -2.978470 | C | 8.113374   | -3.335179 | 4.966746  |
| O | -4.308821 | 6.349099  | 1.155603  | H | 6.896890   | -4.027150 | 3.337468  |
| O | -5.046564 | 1.996366  | 2.305712  | C | 7.089702   | -1.728070 | 6.437504  |
| C | 2.742462  | -0.554042 | 1.379408  | H | 5.071106   | -1.175916 | 5.955359  |
| C | 1.569487  | -0.579295 | 0.580329  | C | 8.183035   | -2.508637 | 6.083712  |
| C | 0.637894  | -1.608369 | 0.788390  | H | 8.966119   | -3.944703 | 4.681909  |
| C | 1.114919  | -2.691321 | 1.590335  | H | 7.133990   | -1.084795 | 7.310516  |
| C | 2.307572  | -2.707659 | 2.323320  | C | 6.084638   | 2.194867  | -4.444414 |
| C | 3.101163  | -1.559065 | 2.262240  | C | 6.125838   | 1.404933  | -5.582225 |
| C | 0.452821  | -3.901620 | 1.554315  | C | 7.215775   | 2.884586  | -4.030317 |
| C | 0.793911  | -5.095871 | 2.175162  | C | 7.304128   | 1.295867  | -6.307912 |
| C | 1.959463  | -5.083646 | 2.965044  | H | 5.238266   | 0.870841  | -5.902166 |
| C | 2.684567  | -3.893549 | 3.019367  | C | 8.390527   | 2.781360  | -4.757378 |
| C | -0.696680 | -1.753363 | 0.162381  | H | 7.174732   | 3.509057  | -3.145246 |
| C | -1.245984 | -3.070148 | 0.068336  | C | 8.439135   | 1.983811  | -5.897395 |
| C | -0.647869 | -4.102895 | 0.761855  | H | 7.327020   | 0.677695  | -7.199382 |
| C | -1.568964 | -0.725120 | -0.227666 | H | 9.267281   | 3.335983  | -4.437228 |
| C | -2.757706 | -1.071102 | -0.922461 | C | -9.790936  | -5.196393 | -4.477275 |
| C | -3.190454 | -2.371557 | -1.119842 | H | -10.254363 | -4.224942 | -4.704579 |
| C | -2.457798 | -3.413025 | -0.544123 | C | -9.526181  | 5.612584  | 4.401527  |
| C | -2.916717 | -4.761640 | -0.480937 | H | -10.033585 | 4.665619  | 4.637989  |
| C | -2.256511 | -5.769655 | 0.220744  | C | 9.486298   | -2.460199 | 6.877810  |
| C | -1.072459 | -5.418109 | 0.896776  | H | 9.936197   | -3.461324 | 6.871704  |
| C | 3.933087  | -3.861182 | 3.808538  | C | 9.767876   | 1.828718  | -6.640373 |
| N | 4.661653  | -2.650085 | 3.784241  | H | 10.406099  | 1.141741  | -6.065400 |
| C | 4.346365  | -1.487726 | 3.047261  | C | 10.500492  | 3.094230  | -6.737588 |
| C | -4.456757 | -2.664844 | -1.815518 | C | 9.619510   | 1.236746  | -7.970435 |
| N | -4.855515 | -4.017506 | -1.795037 | C | 9.286769   | -2.096270 | 8.281433  |
| C | -4.186597 | -5.089597 | -1.161628 | C | 10.454935  | -1.552953 | 6.251419  |
| O | 5.063349  | -0.516723 | 3.072208  | C | -10.757841 | -5.933243 | -3.662087 |
| O | 4.331618  | -4.805952 | 4.449283  | C | -9.602193  | -5.876296 | -5.761333 |
| O | -5.125409 | -1.822793 | -2.365706 | C | -10.456874 | 6.383011  | 3.575386  |
| O | -4.651021 | -6.205072 | -1.187735 | C | -9.310066  | 6.297374  | 5.678674  |
| N | -0.164168 | -6.026558 | 1.766256  | N | -9.439252  | -6.378756 | -6.783495 |
| N | 0.196252  | 5.926984  | -1.748981 | N | -11.521819 | -6.485208 | -3.002228 |

|   |           |           |           |   |            |           |           |
|---|-----------|-----------|-----------|---|------------|-----------|-----------|
| H | 2.721160  | 5.708143  | -3.452479 | N | -9.127186  | 6.802795  | 6.695994  |
| H | 3.427970  | -0.566205 | -1.213475 | N | -11.193770 | 6.961260  | 2.907291  |
| H | -2.311122 | 6.797978  | -0.239962 | N | 9.115274   | -1.820168 | 9.385181  |
| H | -3.395566 | 0.354981  | 1.241853  | N | 11.212247  | -0.859143 | 5.732285  |
| H | 3.427921  | 0.280296  | 1.270518  | N | 11.083021  | 4.085652  | -6.777701 |
| H | 2.339623  | -5.939759 | 3.512275  | N | 9.495007   | 0.743823  | -9.002559 |

**Table S8** Cartesian coordinates (Å) for the optimized  $S_0$  geometry of compound **6** using the PBE0 with 6-311G(d) basis set.

|   |           |           |           |   |            |           |           |
|---|-----------|-----------|-----------|---|------------|-----------|-----------|
| C | 1.825283  | -2.014824 | -5.644781 | H | 2.192160   | -2.389768 | -6.594411 |
| C | 0.654440  | -1.249091 | -5.488815 | H | 3.403421   | -1.295094 | -0.095563 |
| C | 0.330878  | -0.867251 | -4.193598 | H | -2.848499  | 0.985745  | -6.707809 |
| C | 1.021082  | -1.114021 | -3.023975 | H | -3.425669  | 1.294954  | -0.036155 |
| C | 2.220504  | -1.816642 | -3.197682 | H | 3.374234   | 1.287706  | -0.481079 |
| C | 2.575590  | -2.279856 | -4.499545 | H | 2.808810   | 2.338521  | 6.112188  |
| C | 0.565947  | -0.519034 | -1.806062 | H | -3.417804  | -1.334536 | 0.122079  |
| C | 1.519443  | -0.486031 | -0.776900 | H | -2.182432  | -1.060142 | 6.705073  |
| C | 2.698577  | -1.262908 | -0.920063 | H | 0.344058   | 0.710701  | 7.069124  |
| C | 3.041034  | -1.948367 | -2.073409 | H | -0.363143  | -0.777846 | -7.311016 |
| C | -0.772625 | -0.053477 | -4.226775 | C | -5.715792  | -3.342121 | 4.086027  |
| C | -1.345842 | 0.447603  | -3.075731 | C | -6.912949  | -2.843562 | 4.385777  |
| C | -0.770075 | 0.119189  | -1.809404 | S | -5.535585  | -5.098247 | 4.108272  |
| C | -1.215160 | 0.063218  | -5.537551 | H | -7.131301  | -1.785193 | 4.446191  |
| C | -2.394814 | 0.804681  | -5.739124 | S | -8.190259  | -3.962415 | 4.762946  |
| C | -3.032124 | 1.316174  | -4.608995 | C | -7.261198  | -5.396122 | 4.300457  |
| C | -2.554728 | 1.125052  | -3.278227 | C | -7.825725  | -6.603980 | 4.122613  |
| C | -3.259414 | 1.510631  | -2.133724 | S | -9.555670  | -6.900444 | 4.330309  |
| C | -2.806018 | 1.075219  | -0.899595 | S | -6.902345  | -8.039732 | 3.667469  |
| C | -1.617869 | 0.322784  | -0.709917 | C | -9.509609  | -8.490411 | 3.601858  |
| C | 4.300896  | -2.706353 | -2.169682 | C | -8.317014  | -9.002632 | 3.304267  |
| N | 4.595087  | -3.218191 | -3.457977 | H | -10.455828 | -8.995513 | 3.455556  |
| C | 3.829941  | -3.046901 | -4.641953 | H | -8.152335  | -9.985015 | 2.880368  |
| C | -4.289589 | 2.069579  | -4.789810 | C | 6.057940   | 3.991316  | 2.767927  |
| N | -4.930376 | 2.509565  | -3.601546 | C | 7.296947   | 3.504653  | 2.766928  |
| C | -4.516037 | 2.268139  | -2.267555 | S | 5.871513   | 5.744399  | 2.670557  |
| O | 4.208841  | -3.511330 | -5.688589 | H | 7.533688   | 2.448520  | 2.769718  |
| O | 5.049890  | -2.887323 | -1.243572 | S | 8.616199   | 4.635424  | 2.685149  |
| O | -4.768152 | 2.313993  | -5.869662 | C | 7.589563   | 6.061729  | 2.894381  |
| O | -5.167746 | 2.660919  | -1.333657 | C | 8.083225   | 7.278024  | 3.188234  |
| C | 2.754894  | 1.245846  | 0.409104  | S | 9.809377   | 7.593553  | 3.398569  |
| C | 1.573019  | 0.460611  | 0.379557  | S | 7.063878   | 8.706625  | 3.390868  |
| C | 0.725193  | 0.483402  | 1.497876  | C | 9.574050   | 9.188449  | 4.078060  |
| C | 1.295654  | 1.074579  | 2.668076  | C | 8.340068   | 9.688980  | 4.074276  |

|   |           |           |           |   |            |            |           |
|---|-----------|-----------|-----------|---|------------|------------|-----------|
| C | 2.502148  | 1.783818  | 2.726174  | H | 10.452431  | 9.705973   | 4.442027  |
| C | 3.206036  | 1.927739  | 1.526735  | H | 8.068876   | 10.672889  | 4.435186  |
| C | 0.725931  | 0.818331  | 3.898967  | C | 5.777605   | -3.989942  | -3.573789 |
| C | 1.174010  | 1.196066  | 5.157803  | C | 6.962681   | -3.512284  | -3.946643 |
| C | 2.350967  | 1.967157  | 5.201446  | S | 5.655917   | -5.724509  | -3.270840 |
| C | 2.981910  | 2.242500  | 3.988828  | H | 7.146874   | -2.475559  | -4.197241 |
| C | -0.602017 | -0.160142 | 1.629583  | S | 8.283588   | -4.633647  | -4.094610 |
| C | -1.048833 | -0.496559 | 2.945022  | C | 7.392516   | -5.994290  | -3.395960 |
| C | -0.365443 | -0.000604 | 4.036627  | C | 7.992094   | -7.134582  | -3.009538 |
| C | -1.553096 | -0.361947 | 0.617673  | S | 9.732924   | -7.404967  | -3.152925 |
| C | -2.715845 | -1.116927 | 0.920649  | S | 7.108566   | -8.501534  | -2.322165 |
| C | -3.044860 | -1.558182 | 2.191585  | C | 9.727551   | -8.853003  | -2.171390 |
| C | -2.230417 | -1.177998 | 3.262611  | C | 8.548168   | -9.345920  | -1.798147 |
| C | -2.572932 | -1.378314 | 4.632924  | H | 10.687120  | -9.296835  | -1.938788 |
| C | -1.827761 | -0.871739 | 5.697282  | H | 8.409206   | -10.249017 | -1.217655 |
| C | -0.676091 | -0.125141 | 5.384113  | C | -6.106476  | 3.282476   | -3.764955 |
| C | 4.240991  | 3.013437  | 4.009039  | C | -7.334601  | 2.783670   | -3.884494 |
| N | 4.880051  | 3.204588  | 2.755997  | S | -5.923066  | 5.034374   | -3.877458 |
| C | 4.462138  | 2.698571  | 1.498774  | H | -7.563612  | 1.725944   | -3.868032 |
| C | -4.282743 | -2.315703 | 2.445908  | S | -8.646324  | 3.898257   | -4.133371 |
| N | -4.561311 | -2.568015 | 3.812552  | C | -7.657833  | 5.342108   | -3.865547 |
| C | -3.803643 | -2.137311 | 4.933996  | C | -8.188422  | 6.564446   | -3.682586 |
| O | 5.106889  | 2.893001  | 0.499865  | S | -9.929043  | 6.871570   | -3.687164 |
| O | 4.727352  | 3.467524  | 5.014986  | S | -7.206009  | 8.010345   | -3.425728 |
| O | -5.026333 | -2.700839 | 1.579859  | C | -9.781964  | 8.500237   | -3.065480 |
| O | -4.168763 | -2.392028 | 6.054956  | C | -8.558232  | 9.012079   | -2.948192 |
| N | 0.290355  | 0.614371  | 6.069679  | H | -10.699246 | 9.026011   | -2.833083 |
| N | -0.317596 | -0.675650 | -6.311743 | H | -8.335626  | -10.014817 | -2.606347 |

**Table S9** Cartesian coordinates (Å) for the optimized S<sub>0</sub> geometry of compound **7** using the PBE0 with 6-311G(d) basis set.

|   |           |           |           |   |           |           |           |
|---|-----------|-----------|-----------|---|-----------|-----------|-----------|
| C | 1.485646  | -3.661126 | -4.757671 | H | -3.924239 | 1.143521  | -0.555820 |
| C | 0.307468  | -2.898780 | -4.870814 | H | 2.885741  | 1.077584  | -0.829033 |
| C | -0.050303 | -2.142313 | -3.762880 | H | 2.154927  | 4.121221  | 5.096052  |
| C | 0.609847  | -2.011271 | -2.557793 | H | -3.910427 | -1.299826 | 0.409846  |
| C | 1.816196  | -2.719035 | -2.479987 | H | -2.850133 | 1.035982  | 6.599843  |
| C | 2.207137  | -3.553575 | -3.569223 | H | -0.330514 | 2.848029  | 6.456038  |
| C | 0.120281  | -1.078290 | -1.591092 | H | -0.666416 | -3.022091 | -6.771832 |
| C | 1.046987  | -0.720427 | -0.599927 | C | 5.477981  | 4.689663  | 1.476428  |
| C | 2.231780  | -1.491018 | -0.469625 | C | 6.718573  | 4.240776  | 1.653938  |
| C | 2.607027  | -2.492065 | -1.349574 | S | 5.287416  | 6.325919  | 0.840150  |
| C | -1.157392 | -1.392692 | -4.068314 | H | 6.959526  | 3.239714  | 1.987576  |
| C | -1.763062 | -0.572212 | -3.138582 | S | 8.034680  | 5.307588  | 1.258803  |

|   |           |           |           |   |            |           |           |
|---|-----------|-----------|-----------|---|------------|-----------|-----------|
| C | -1.218376 | -0.488229 | -1.819785 | C | 6.996530   | 6.718224  | 1.005202  |
| C | -1.568450 | -1.689690 | -5.360891 | C | 7.475658   | 7.973367  | 0.937202  |
| C | -2.749196 | -1.064351 | -5.804787 | S | 9.192934   | 8.359972  | 1.092106  |
| C | -3.418563 | -0.241144 | -4.899294 | S | 6.444331   | 9.383796  | 0.677697  |
| C | -2.971028 | -0.007790 | -3.565753 | C | 8.929622   | 10.081288 | 1.262344  |
| C | -3.707403 | 0.701529  | -2.613015 | C | 7.694092   | 10.541604 | 1.075836  |
| C | -3.282258 | 0.675483  | -1.295124 | H | 9.793987   | 10.695026 | 1.481540  |
| C | -2.095022 | 0.033295  | -0.855642 | H | 7.407227   | 11.584439 | 1.121483  |
| C | 3.871792  | -3.229003 | -1.179205 | C | 5.394871   | -4.855597 | -2.092020 |
| N | 4.203278  | -4.103860 | -2.243448 | C | 6.587158   | -4.488699 | -2.556286 |
| C | 3.469178  | -4.311211 | -3.440831 | S | 5.279358   | -6.422859 | -1.288385 |
| C | -4.680966 | 0.397779  | -5.323287 | H | 6.769868   | -3.570251 | -3.099061 |
| N | -5.350493 | 1.174284  | -4.350290 | S | 7.922665   | -5.578010 | -2.323838 |
| C | -4.964285 | 1.363388  | -3.005212 | C | 7.022224   | -6.681629 | -1.272795 |
| O | 3.877992  | -5.067153 | -4.286944 | C | 7.619512   | -7.638382 | -0.539930 |
| O | 4.595233  | -3.110944 | -0.223256 | S | 9.367040   | -7.902879 | -0.539395 |
| O | -5.138404 | 0.278817  | -6.436350 | S | 6.725643   | -8.750704 | 0.501525  |
| O | -5.635309 | 2.022909  | -2.248637 | C | 9.340781   | -8.987714 | 0.832693  |
| C | 2.245899  | 1.306963  | 0.016934  | C | 8.153784   | -9.368916 | 1.300567  |
| C | 1.068452  | 0.537804  | 0.207692  | H | 10.295812  | -9.321422 | 1.217961  |
| C | 0.194248  | 0.896102  | 1.245313  | H | 8.002998   | 10.057721 | 2.121948  |
| C | 0.734423  | 1.827023  | 2.186370  | C | -6.355854  | -1.944047 | 4.736753  |
| C | 1.935405  | 2.534353  | 2.046252  | C | -7.467640  | -1.169718 | 5.036266  |
| C | 2.666944  | 2.307431  | 0.876694  | C | -6.402127  | -3.320954 | 4.888648  |
| C | 0.136650  | 1.958942  | 3.423364  | C | -8.629193  | -1.776139 | 5.487637  |
| C | 0.549996  | 2.717234  | 4.510538  | H | -7.422017  | -0.092342 | 4.925555  |
| C | 1.721956  | 3.478044  | 4.337205  | C | -7.566493  | -3.929988 | 5.334877  |
| C | 2.381547  | 3.369325  | 3.113465  | H | -5.528593  | -3.919659 | 4.656369  |
| C | -1.133625 | 0.311080  | 1.540297  | C | -8.683173  | -3.158999 | 5.635235  |
| C | -1.612033 | 0.397027  | 2.884507  | H | -9.490394  | -1.163210 | 5.734914  |
| C | -0.956459 | 1.213376  | 3.783701  | H | -7.592781  | -5.008087 | 5.455630  |
| C | -2.059887 | -0.204521 | 0.620321  | C | -6.566004  | 1.815929  | -4.764114 |
| C | -3.229030 | -0.837871 | 1.116990  | C | -7.686076  | 1.051398  | -5.060267 |
| C | -3.589834 | -0.861306 | 2.453936  | C | -6.613881  | 3.198190  | -4.866911 |
| C | -2.802046 | -0.158637 | 3.369917  | C | -8.854642  | 1.674680  | -5.467704 |
| C | -3.183038 | 0.078630  | 4.723342  | H | -7.639196  | -0.028661 | -4.983019 |
| C | -2.465876 | 0.897989  | 5.594709  | C | -7.786796  | 3.822617  | -5.266088 |
| C | -1.303721 | 1.515329  | 5.093731  | H | -5.735188  | 3.787650  | -4.631185 |
| C | 3.636402  | 4.123368  | 2.919807  | C | -8.907634  | 3.061021  | -5.572199 |
| N | 4.303883  | 3.924344  | 1.682891  | H | -9.729100  | 1.073861  | -5.700619 |
| C | 3.919045  | 3.047994  | 0.636827  | H | -7.818276  | 4.904258  | -5.349774 |
| C | -4.833831 | -1.510152 | 2.906048  | C | -9.997878  | -3.819163 | 6.056690  |
| N | -5.151925 | -1.318616 | 4.266819  | H | -10.639453 | -3.907937 | 5.167489  |

|   |           |           |           |   |            |           |           |
|---|-----------|-----------|-----------|---|------------|-----------|-----------|
| C | -4.428473 | -0.551072 | 5.207972  | C | -10.221506 | 3.713116  | -5.996130 |
| O | 4.585779  | 2.930818  | -0.359675 | C | -10.743363 | -3.013611 | 7.027193  |
| O | 4.096452  | 4.872396  | 3.745417  | N | -11.337380 | -2.357939 | 7.762766  |
| O | -5.548025 | -2.161059 | 2.181403  | C | -9.819130  | -5.177338 | 6.572441  |
| O | -4.829964 | -0.432218 | 6.341837  | N | -9.671811  | -6.255150 | 6.947130  |
| N | -0.356495 | 2.441507  | 5.536675  | C | -10.030826 | 5.005227  | -6.656955 |
| N | -0.647227 | -2.618343 | -5.851122 | N | -9.867456  | 6.014357  | -7.185051 |
| H | 1.878834  | -4.304077 | -5.538044 | C | -11.135335 | 3.856748  | -4.856818 |
| H | 2.914911  | -1.261521 | 0.341715  | N | -11.850548 | 3.937247  | -3.958819 |
| H | -3.181444 | -1.198020 | -6.790811 | H | -10.717834 | 3.057074  | -6.722720 |
